# Supplementary material for: Vertical graphene growth on uniformly dispersed sub-nanoscale SiOx/N-doped carbon composite microspheres with a 3D conductive network and an ultra-low volume deformation for fast and stable lithium-ion storage
Source: Royal Society of Chemistry journal article supplement (doi:10.1039/c9ta12554j), 2020-01-01
Supplement: c9ta12554j1.pdf [file c9ta12554j1.pdf]

## Electronic Supplementary Information

### Vertical graphene growth on uniformly dispersed sub-nanoscale SiO<sub>x</sub>/N-doped carbon composite microspheres with a 3D conductive network and an ultra-low volume deformation for fast and stable lithium-ion storage

Meisheng Han<sup>1a,b</sup>, Yongbiao Mu<sup>1a</sup>, Fu Yuan,<sup>a</sup> Jingbing Liang,<sup>a</sup> Tao Jiang,<sup>a</sup> Xuedong Bai<sup>b</sup>, and Jie Yu<sup>\*a,c</sup>

<sup>a</sup>Songshan Lake Materials Laboratory Dongguan, Guangdong 523808, China

<sup>b</sup>Beijing National Laboratory for Condensed Matter Physics, Institute of Physics, Chinese Academy of Sciences, Beijing 100190, China

<sup>c</sup>Shenzhen Engineering Lab for Supercapacitor Materials, Shenzhen Key Laboratory for Advanced Materials, School of Material Science and Engineering, Harbin Institute of Technology, Shenzhen, University Town, Shenzhen 518055, China

\*Corresponding Author.

E-mail address: jyu@hit.edu.cn (J. Yu);

<sup>1</sup>Both authors contributed equally to this work.

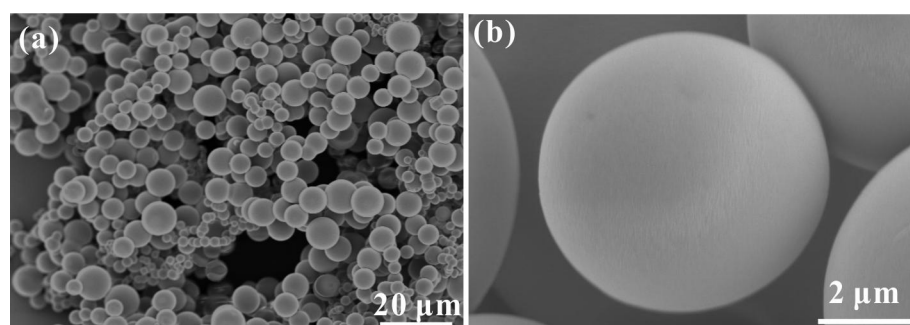

**Fig. S1** SEM images of SiOCN spheres.

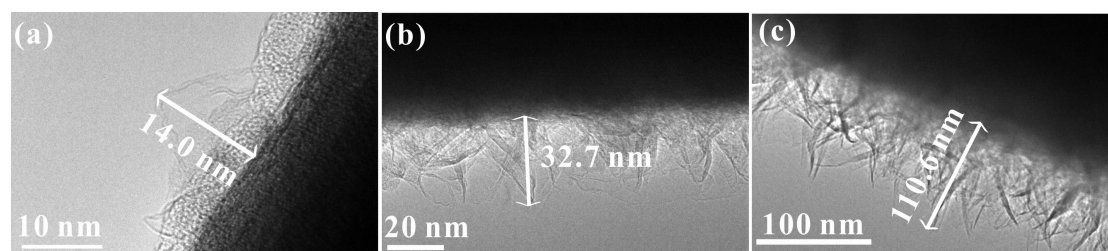

**Fig. S2** Transmission electron microscope (TEM) images of VG@SiO<sub>x</sub>/NC obtained at 1100 °C with a 6.25% volume ratio of CH<sub>4</sub> in the mixture gas of CH<sub>4</sub> and H<sub>2</sub> with different growth time (a) 4 h, (b) 6 h, and (c) 8 h.

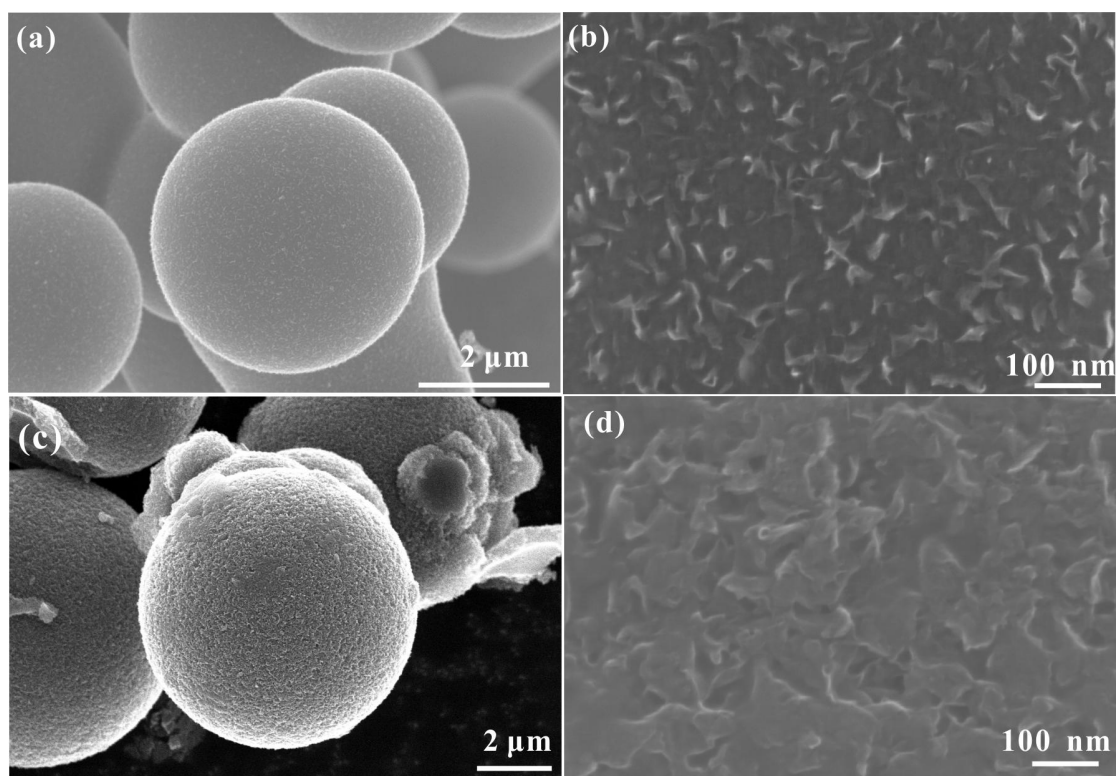

**Fig. S3** SEM images of VG@SiO<sub>x</sub>/NC obtained at 1100 °C for 8 h in different volume ratios of CH<sub>4</sub> in the mixture gas of CH<sub>4</sub> and H<sub>2</sub> (a,b) 5% and (c,d) 8.5%.

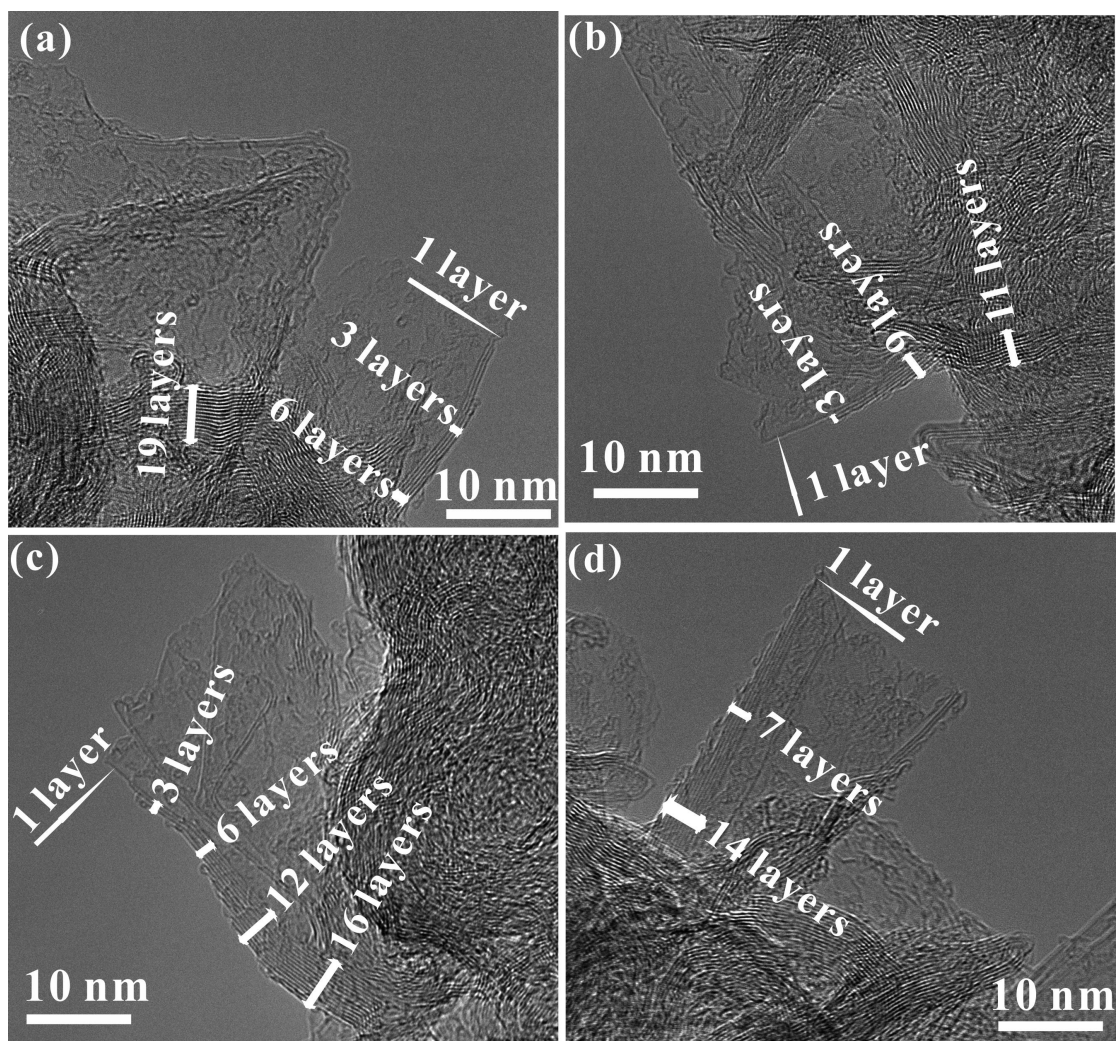

**Fig. S4** High resolution transmission electron microscope images of edge of VG@SiO<sub>x</sub>/NC obtained at 1100 °C for 8 h in 6.25% volume ratio of CH<sub>4</sub> in the mixture gases of CH<sub>4</sub> and H<sub>2</sub>.

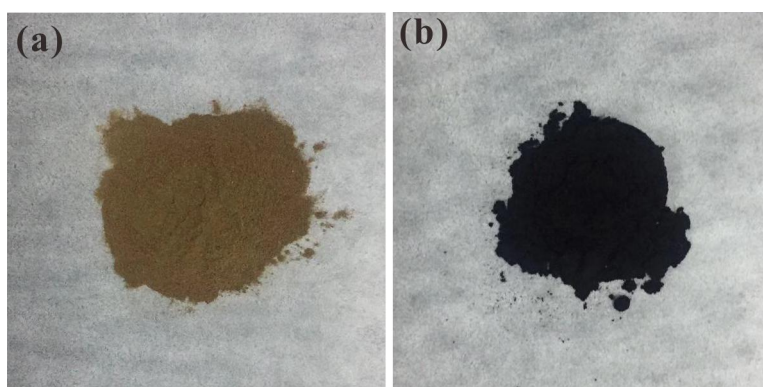

**Fig. S5** The optical images of SiOCN (a) and SiO<sub>x</sub>/NC (b).

**Table S1** Chemical composition of the obtained samples from elemental analysis results.

| Samples                 | Si (wt/at%) | O (wt/at%) | C (wt/at%) | N (wt/at%) | H (wt/at%) |
|-------------------------|-------------|------------|------------|------------|------------|
| SiOCN                   | 41.0/16.5   | 16.7/11.7  | 32.7/30.7  | 6.4/5.1    | 3.2/36.0   |
| SiO <sub>x</sub> /NC    | 43.3/26.5   | 17.9/19.2  | 33.2/47.4  | 5.6/6.9    | 0/0        |
| VG@SiO <sub>x</sub> /NC | 39.9/23.6   | 16.4/17.0  | 38.4/53.1  | 5.3/6.3    | 0/0        |

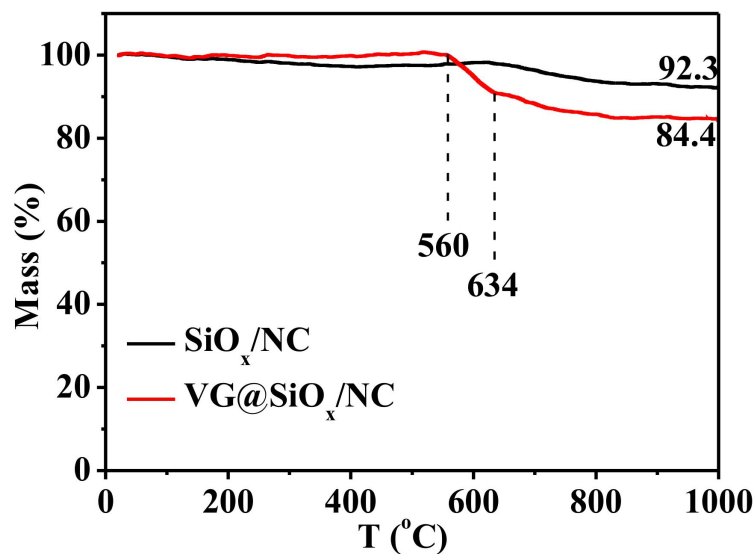

**Fig. S6** TG curves of SiO<sub>x</sub>/NC and VG@SiO<sub>x</sub>/NC. The testing conditions are that samples were heated from room temperature to 1000 °C at a heating rate of 2 °C min<sup>-1</sup> in air atmosphere.

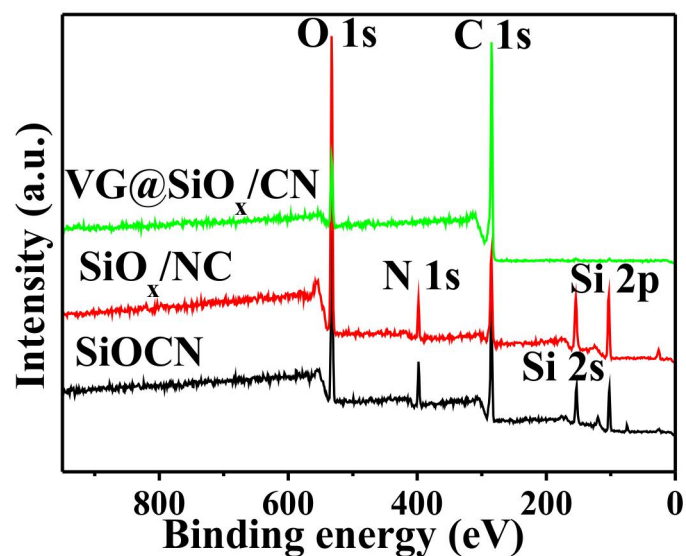

**Fig. S7** XPS survey peaks of samples.



**Table S2** Fitting results of XPS spectra of the obtained samples.

| Samples                  | Si (at%) | O (at%) | C (at%) | N (at%) |
|--------------------------|----------|---------|---------|---------|
| SiOCN                    | 19.16    | 23.29   | 49.13   | 8.42    |
| SiO <sub>x</sub> /NC     | 22.72    | 32.40   | 38.90   | 5.98    |
| VG@ SiO <sub>x</sub> /NC | 1.16     | 11.63   | 86.99   | 0.22    |

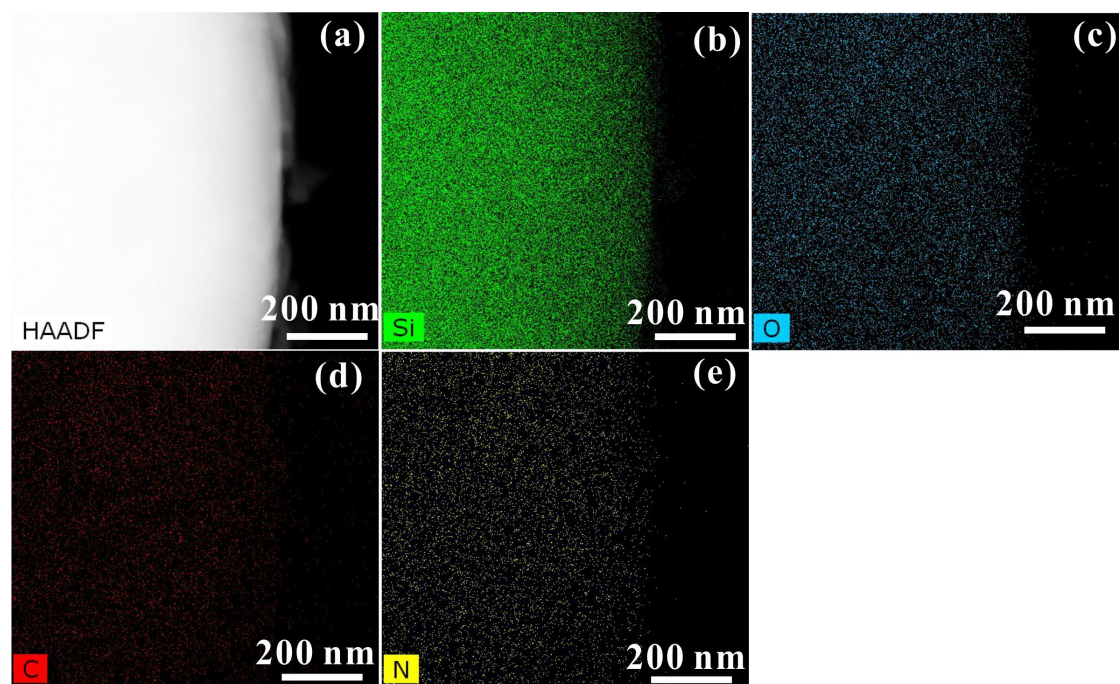

**Fig. S8** High angle annular dark field (HAADF) image (a) and corresponding EDS elemental mapping images of Si (b), O (c), C (d), and N (e) of crushed SiO<sub>x</sub>/NC spheres.

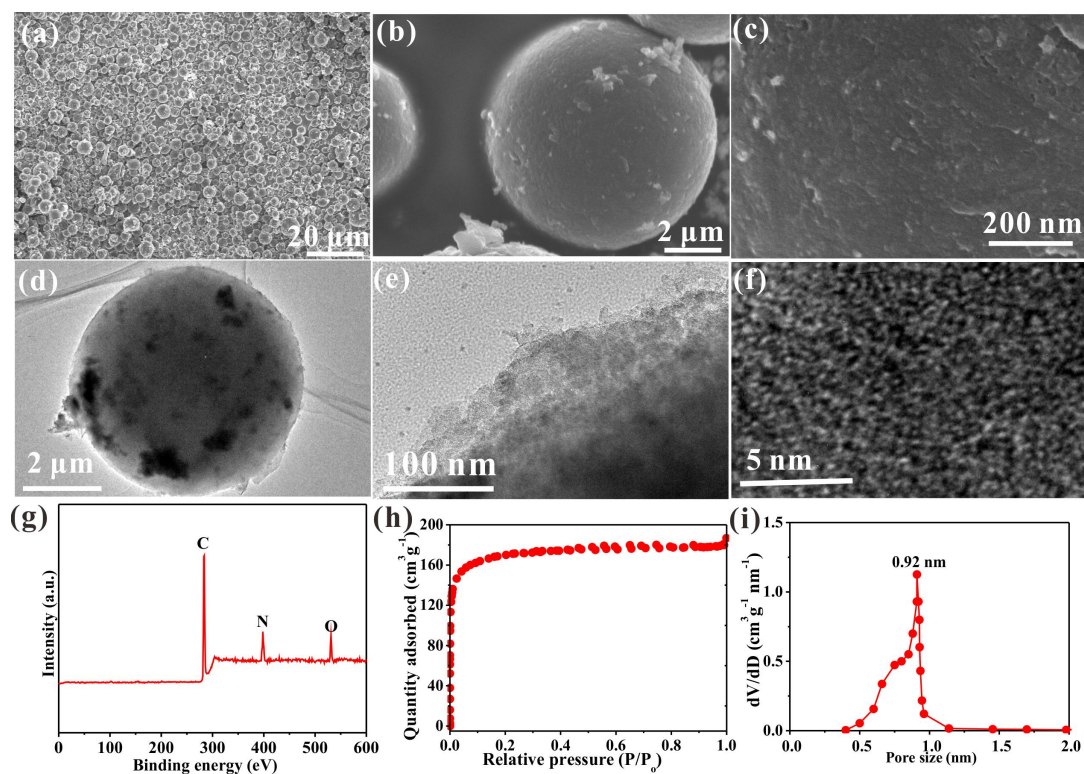

**Fig. S9** (a-c) SEM images, (d-f) TEM images, (g) XPS survey spectrum, (h) Nitrogen adsorption-desorption isotherms, and (i) pore-size distribution calculated by BJH method of NC.

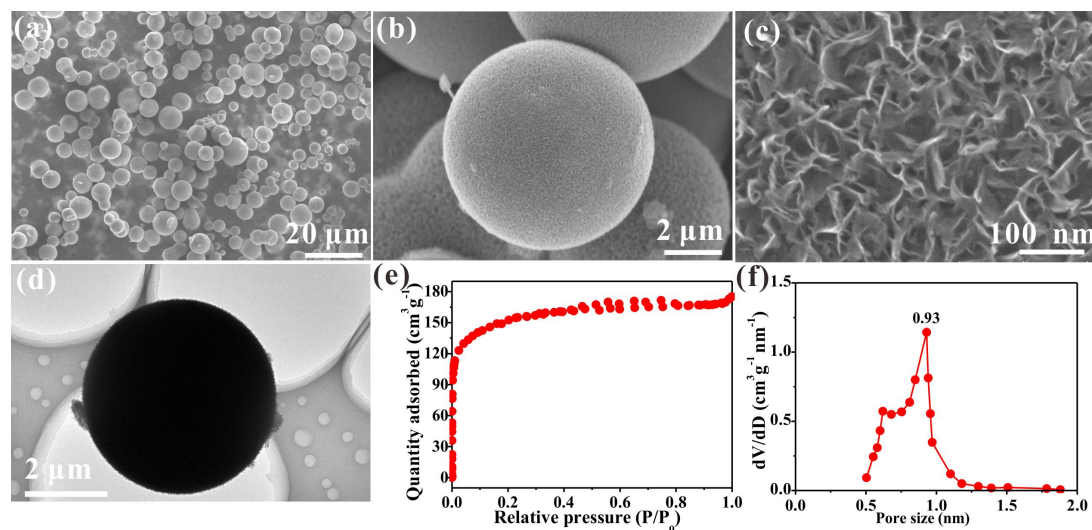

**Fig. S10** (a-c) SEM images, (d) TEM image, (e) Nitrogen adsorption-desorption isotherms, and (f) pore-size distribution calculated by BJH method of VG@NC.

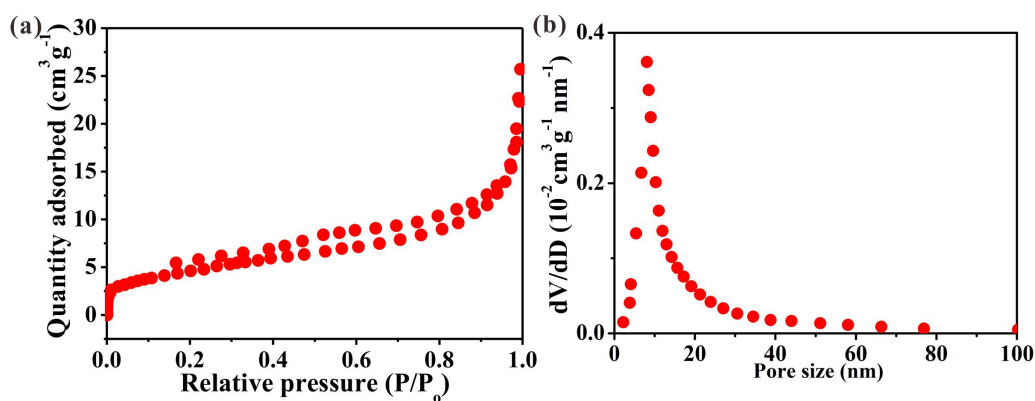

**Fig. S11** (a) Nitrogen adsorption-desorption isotherms and (b) pore-size distribution calculated by BJH method of SiO<sub>x</sub>/NC.

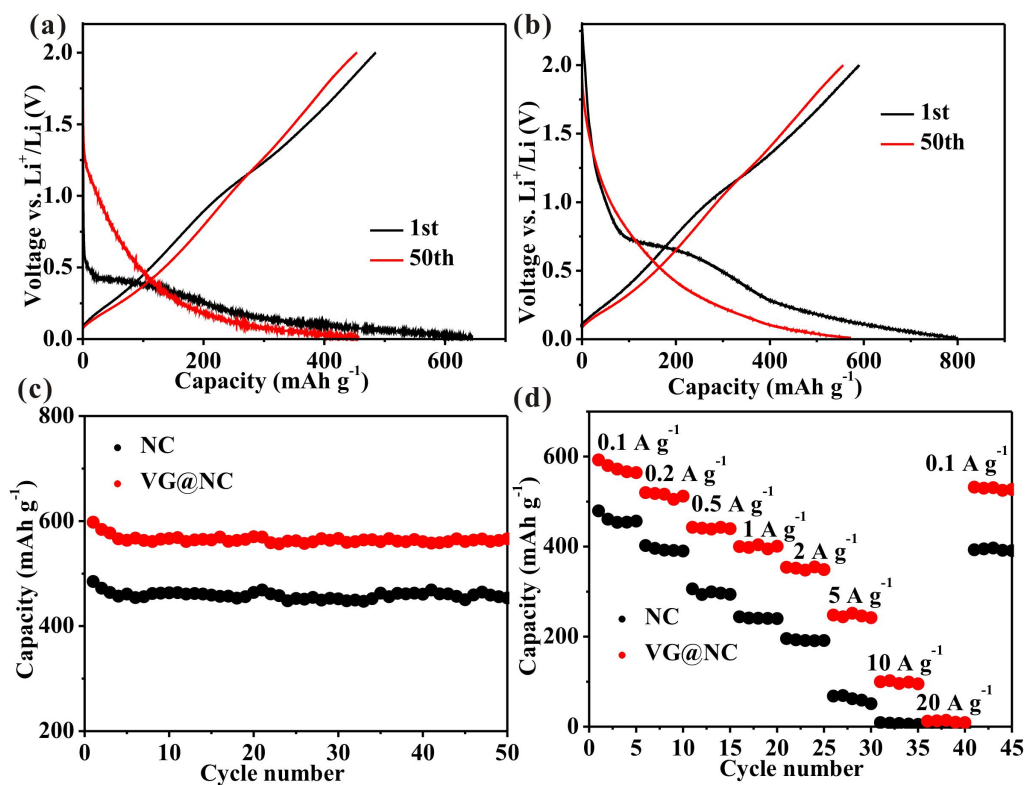

**Fig. S12** (a) Charge/discharge curves of NC, (b) Charge/discharge curves of VG@NC, (c) Cycling curves of NC and VG@NC at a current density of 0.1 A g<sup>-1</sup>, and (d) Rate performances of NC and VG@NC.

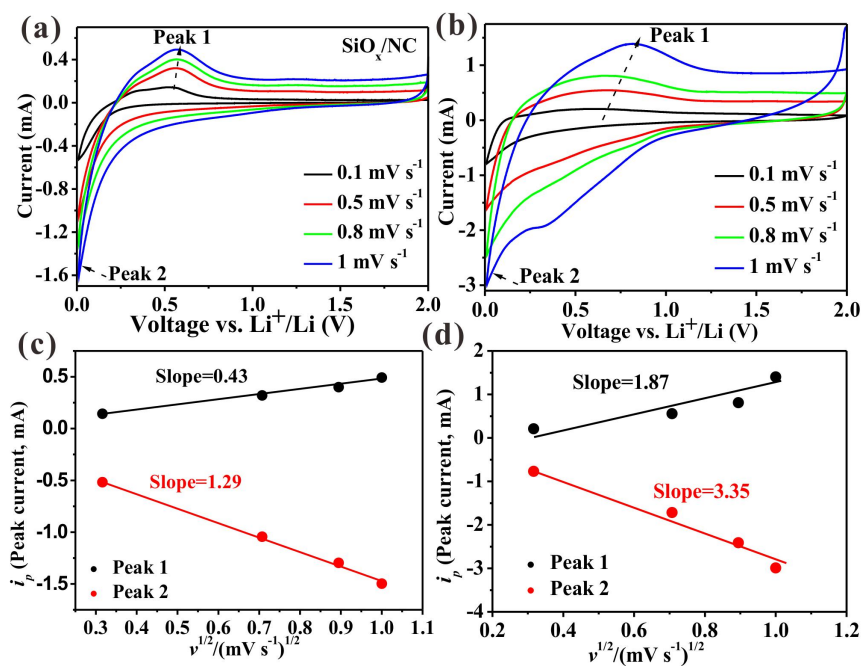

**Fig. S13** (a,b) CV curves at different scanning rates of SiO<sub>x</sub>/NC (a) and VG@SiO<sub>x</sub>/NC (b) after experiencing 100 cycles at a current density of 0.1 A g<sup>-1</sup>, and (c,d) the peak current against the square root of scan rates for the SiO<sub>x</sub>/NC (c) and VG@SiO<sub>x</sub>/NC (d).



**Table S3** Lithium ion storage performances of SiO<sub>x</sub> (0<x<2) and its composites reported. The charge capacity mean those obtained in the final cycle. C<sub>C</sub>-charge capacity (mAh g<sup>-1</sup>), C<sub>R</sub>-capacity retention (%), M<sub>L</sub>-Mass loading (mg cm<sup>-2</sup>), J-current density (A g<sup>-1</sup>), N<sub>C</sub>-cycle number, NA-not available.

| Samples                             | C <sub>C</sub> | C <sub>R</sub> | M <sub>L</sub> | J         | N <sub>C</sub> | References                                               |
|-------------------------------------|----------------|----------------|----------------|-----------|----------------|----------------------------------------------------------|
| VG@SiO <sub>x</sub> /NC             | 1229.2         | 92.9           | 1.5            | 0.1       | 100            | <b>This work</b>                                         |
| VG@SiO <sub>x</sub> /NC             | 641.9          | 84.2           | 1.5            | 2         | 500            | <b>This work</b>                                         |
| VG@SiO <sub>x</sub> /NC             | 265.5          | NA             | 1.5            | 20        | NA             | <b>This work</b>                                         |
| Si@SiO <sub>x</sub> /C              | 1361.9         | 83.3           | 3              | 0.2       | 100            | <i>ACS Nano</i> , 2019, <b>13</b> , 9607–9619.           |
| Si@SiO <sub>x</sub> /C              | 1342           | NA             | 3              | 4         | NA             | <i>ACS Nano</i> , 2019, <b>13</b> , 9607–9619.           |
| Si/SiO <sub>x</sub> -SiO            | ~780           | 80.7           | 1.2            | 0.2       | 350            | <i>J. Mater. Chem. A</i> , 2019, <b>7</b> , 15621-15626. |
| Ni/SiO <sub>x</sub> /N-doped C      | ~820           | 93.7           | 0.53           | 0.2       | 70             | <i>J. Mater. Chem. A</i> , 2019, <b>7</b> , 15969-15974. |
| Ni/SiO <sub>x</sub> /N-doped carbon | 289.8          | NA             | 0.53           | 10        | NA             | <i>J. Mater. Chem. A</i> , 2019, <b>7</b> , 15969-15974. |
| SiO <sub>x</sub> /G/C               | 487            | 74.6           | 3.5            | 0.12      | 500            | <i>Nano Energy</i> , 2019, <b>60</b> , 485-492.          |
| SiO <sub>x</sub> /G/C               | 582.5          | NA             | 3.5            | 3         | NA             | <i>Nano Energy</i> , 2019, <b>60</b> , 485-492.          |
| SiO <sub>x</sub> /C                 | 895            | 80.8           | 1.2            | 0.2       | 200            | <i>J. Mater. Chem. A</i> , 2018, <b>6</b> , 14903-14909. |
| SiO <sub>x</sub> /C                 | 532            | NA             | 1.2            | 2         | NA             | <i>J. Mater. Chem. A</i> , 2018, <b>6</b> , 14903-14909. |
| SiO <sub>x</sub> /G                 | 950            | 91.2           | 1.5            | 0.5       | 100            | <i>Adv. Mater.</i> 2018, <b>30</b> , 1707430.            |
| SiO <sub>x</sub> /G                 | 661            | NA             | 1.5            | 10        | NA             | <i>Adv. Mater.</i> 2018, <b>30</b> , 1707430.            |
| SiO <sub>x</sub> /C                 | 580            | 90             | 3.5            | 0.32<br>5 | 500            | <i>Adv. Funct. Mater.</i> 2018, <b>28</b> , 1705235.     |
| D-SiO/graphene                      | 930            | 93             | 1.5            | 0.32      | 100            | <i>Nano Lett.</i> 2017, <b>17</b> , 3681-3687.           |
| Si-SiO <sub>x</sub> -C              | 1034.6         | 77.6           | 1              | 1.03      | 200            | <i>Nano Lett.</i> 2017, <b>17</b> , 1870-1876.           |
| Si/C/SiOC                           | ~193           | NA             | 2.0            | 0.4       | 100            | <i>ACS Nano</i> 2017, <b>11</b> , 11409-11416.           |
